# Supplementary material for: A Label-Free Liquid Crystal Biosensor Based on Specific DNA Aptamer Probes for Sensitive Detection of Amoxicillin Antibiotic
Source: MDPI journal article supplement (doi:10.3390/mi12040370), 2021-03-30
Supplement: s1 [file s1]

# Supplementary Material

## A Label-Free Liquid Crystal Biosensor Based on Specific DNA Aptamer Probes for Sensitive Detection of Amoxicillin Antibiotic

Duy Khiem Nguyen and Chang-Hyun Jang

### 1. Preparation of modified glass slides and fabrication of LC cells

#### 1.1. Cleaning of glass slides

Glass slides were cut into 2.5 cm × 1 cm pieces and immersed in a freshly prepared piranha solution (70% H<sub>2</sub>SO<sub>4</sub> and 30% H<sub>2</sub>O<sub>2</sub>, v/v) at 80 °C for 2 h in a nitrogen-rich atmosphere to remove all organic contaminants on the surface of glass slides. After cooling, the slides were rinsed turn-wise in DI water, ethanol, and methanol to remove the residual acid, followed by drying under nitrogen flow and heating in an oven at 120 °C overnight. Hydroxyl groups were formed on the surface of the glass slides after piranha treatment.

#### 1.2. Preparation of covering glass slides

The cleaned glass slides were immersed in an aqueous solution containing 0.1% (v/v) DMOAP at room temperature for 1 h, rinsed several times with DI water, dried with nitrogen flow, and heated at 120 °C for 1 h. The DMOAP-modified glass slides were then utilized as upper glass slides in the fabrication of LC cells in subsequent experiments.

#### 1.3. Preparation of bottom glass slides

##### 1.3.1. Preparation of GA-modified glass slides

First, the cleaned glass slides were immersed in an ethanol solution containing a mixture of 0.8% (v/v) APTES and 0.4% (v/v) DMOAP at 80 °C for 1 h. After washing several times with ethanol and DI water, the glass slides were dried under nitrogen flow and heated at 120 °C for 1 h. Subsequently, the APTES/DMOAP-modified glass slides were immersed in an aqueous solution containing 0.001% (v/v) GA at room temperature for 30 min, followed by washing several times with DI water and drying under nitrogen flow. The GA-modified glass slides were stored at 4 °C until further use.

##### 1.3.2. Immobilization of AMX aptamers onto GA-modified glass slides

AMX solutions of various concentrations were prepared by diluting a 100 μM AMX stock solution with 0.01 mol L<sup>-1</sup> PBS buffer (pH 7.4, 138 mM NaCl, 2.7 mM KCl). A volume of 2 μL of AMX aptamer solution at each concentration was dropped onto the surface of GA-modified glass slides to form circular spots, and then incubated in an oven at 25 °C for 2 h in a water-saturated environment. After incubation, the glass slides were rinsed successively with PBS buffer (pH 7.4) and DI water several times to remove the unbound AMX aptamer, and then dried under a nitrogen stream. This resulted in the immobilization of the AMX aptamer on the glass slides with a circular spot of

approximately 2.2 mm. To block the unreacted aldehyde groups (from GA), the AMX aptamer-immobilized glass slides were immersed in 20 mM ethanolamine aqueous solution at room temperature (~25 °C) for 30 min, followed by washing with excess DI water and drying under nitrogen flow. The AMX aptamer-immobilized glass slides served as bottom glass slides in the fabrication of LC biosensors.

#### *1.4. Fabrication of LC cells*

To fabricate the LC cells, the upper glass slides modified with DMOAP and the bottom glass slides modified with different reagents were paired face to face, spaced with a thin polyester film (thickness ~10  $\mu\text{m}$ ), and held together with two small binder clips. The 5CB was heated on a hot plate to a temperature of around 40 °C, corresponding to its isotropic phase, before injecting into the gap between the two glass slides using a micropipette. Finally, the LC cells were slowly cooled to room temperature (~25 °C) in the nematic phase of 5CB prior to characterization.

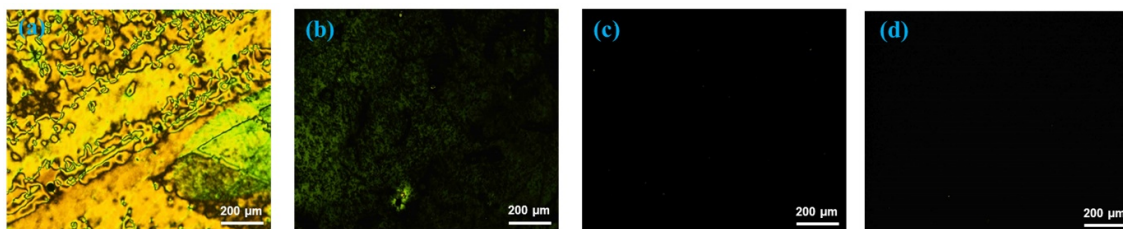

**Figure S1.** POM images of LC cells with 5CB in which the surface of the bottom glass slide is modified with different ratios (v/v) of APTES/DMOAP: (a) 5:1; (b) 3:1; (c) 2:1 and (d) 1:1. Scale bar, 200  $\mu\text{m}$ .

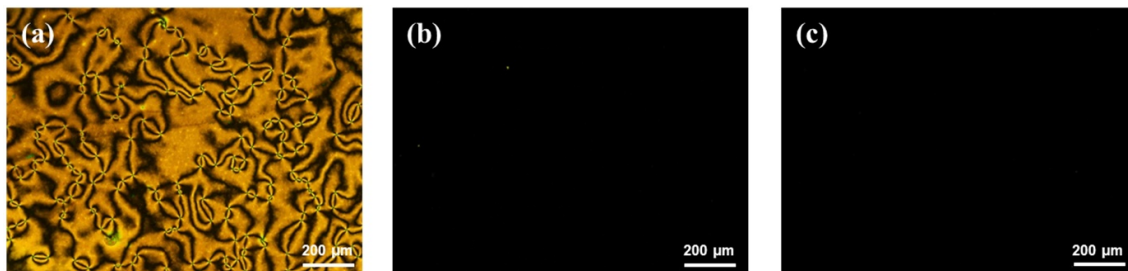

**Figure S2.** POM images of LC cells with 5CB in which the bottom glass slide is modified with APTES/DMOAP (2:1) while the covering glass slide is modified with DMOAP at different concentrations (v/v): (a) 0 %; (b) 0.1%; and (c) 0.2%. Scale bar, 200  $\mu\text{m}$ .

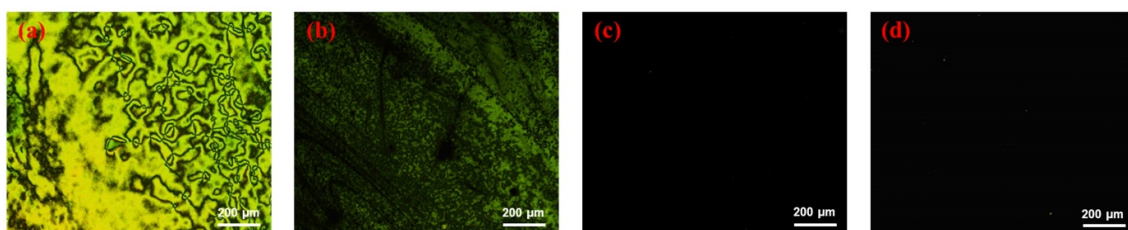

**Figure S3.** POM images of LC cells with 5CB in which the surface of the bottom glass slide is grafted with various concentrations of GA (APTES/DMOAP = 2:1): (a) 1%; (b) 0.1%; (c) 0.01% and (d) 0.001%. The covering glass slide is modified with 0.1% DMOAP. Scale bar, 200  $\mu\text{m}$ .

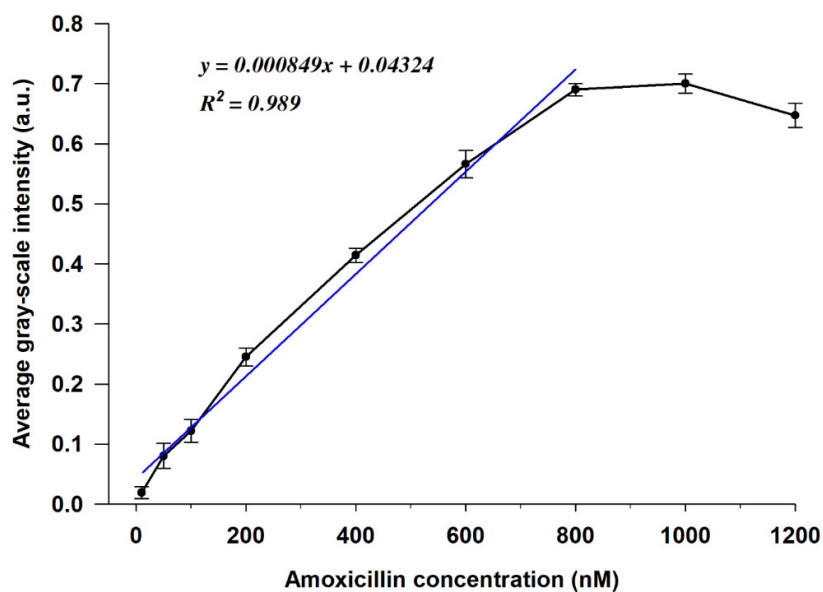

**Figure S4.** Relationship between the average gray-scale intensity of the optical images and the concentrations of AMX. When the concentration of AMX was over 800 nM, the optical signal of the LC cells was saturated.

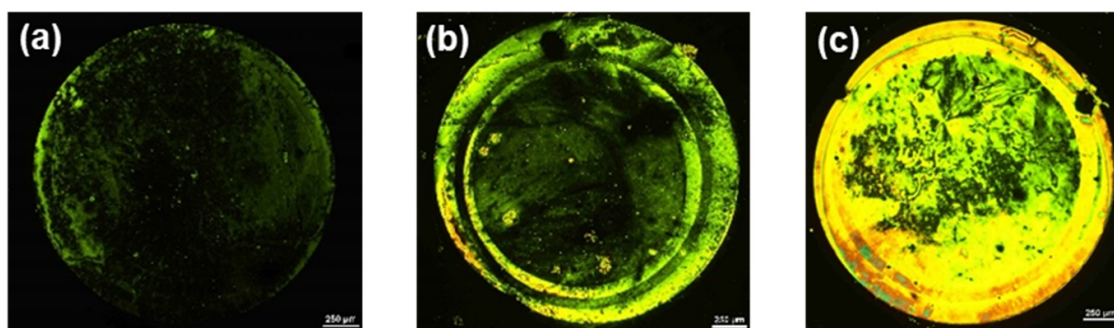

**Figure S5.** POM images of LC cells with 5CB in the presence of different concentrations of AMX in spiked tap water samples: (a) 50 nM, (b) 400 nM, and (c) 800 nM. Scale bar, 250  $\mu\text{m}$ .

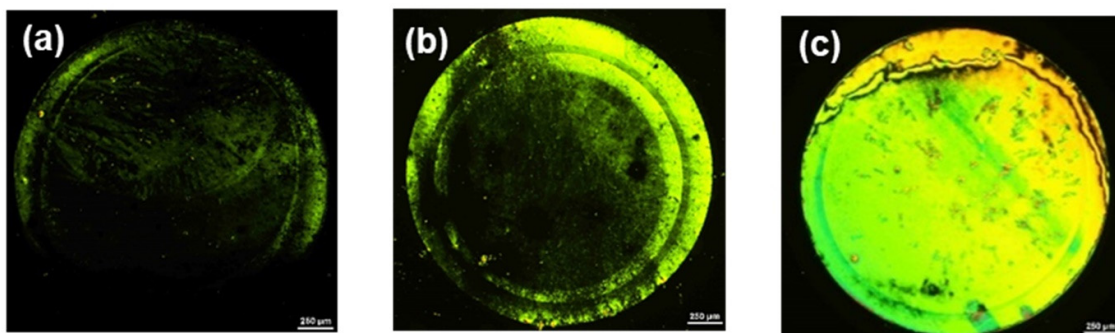

**Figure S6.** POM images of LC cells with 5CB in the presence of different concentrations of AMX in spiked river water samples: (a) 50 nM, (b) 400 nM, and (c) 800 nM. Scale bar, 250  $\mu\text{m}$ .

### **MATLAB code used for calculation of gray-scale intensity of the POM images**

```
clear all

close all

clc

% Directory of image folder

file_path = 'images/';

img_path_list = dir(strcat(file_path, '*.jpg'));

% Num of images

img_num = length(img_path_list);

% Zero array

Result_Value = zeros(img_num,1);

addpath(file_path);

i = 1;

fprintf('Num of images: %d \n', img_num);

while i <= img_num

    % Read and convert image from color to grayscale

    Orig_Picture = imread (img_path_list(i).name);

    % Threshold for zero pixel

    Gray_Picture = im2bw(Orig_Picture,0.15);

    % Count num of none zero pixels

    Light_Pixel_Num = nnz (Gray_Picture);

    % Size of gray image

    [m, n] = size(Gray_Picture);

    % Total pixels

    Picture_Pixel_Num = m * n;

    % Intensity value

    Result_Value(i,1) = Light_Pixel_Num / Picture_Pixel_Num;

    % Print output value

    fprintf('The intensity of image %s is %f \n', img_path_list(i).name, Result_Value(i,1));
```

```
    i=i+1;  
end
```
